# Supplementary material for: Effects and formulation of silver nanoscaffolds on cytotoxicity dependent ion release kinetics towards enhanced excision wound healing patterns in Wistar albino rats
Source: PubMed Central journal article supplement — RSC Adv. 2019 Nov 4;9(61):35677–94. doi: 10.1039/c9ra06913e (PMC9074428; doi:10.1039/c9ra06913e), 2019-11-04
Supplement: RA-009-C9RA06913E-s001.pdf [file RA-009-C9RA06913E-s001.pdf]

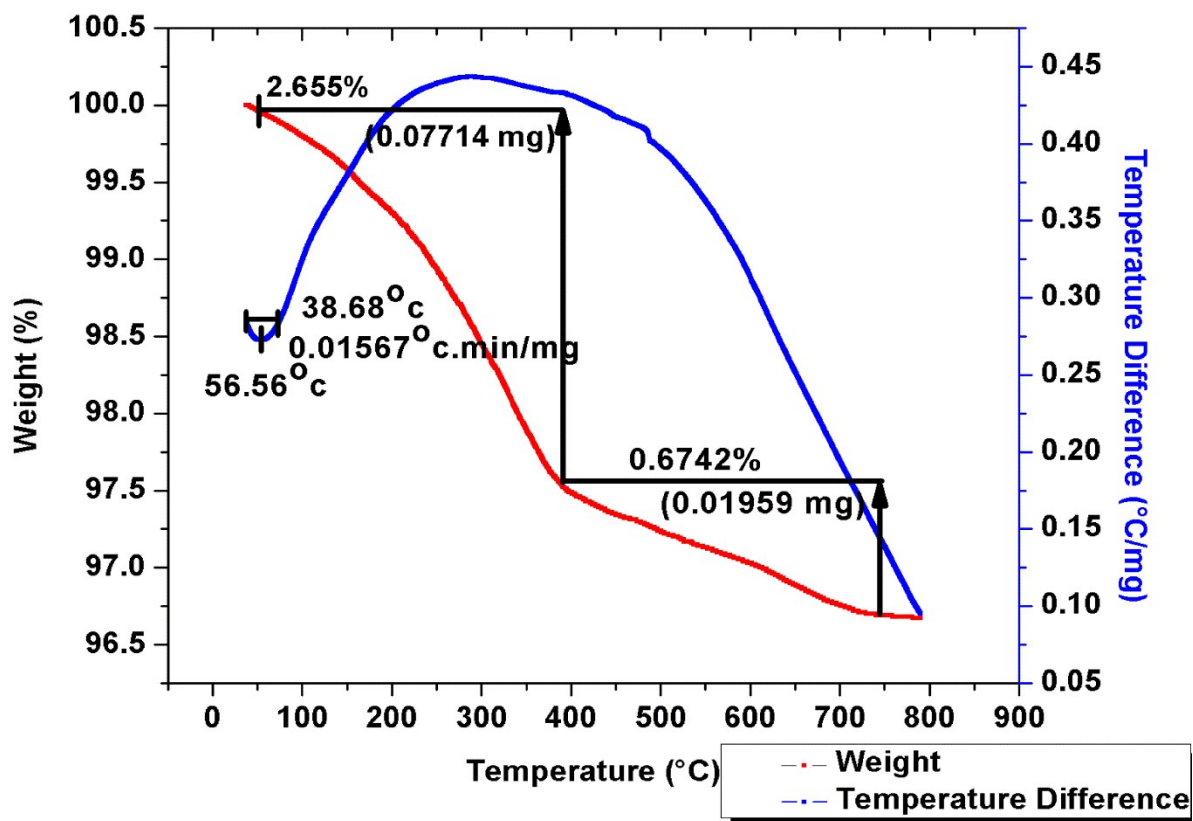

Fig. 1 Evaluation of Thermo gravimetric analysis/ Differential Thermal analysis (TGA/DTA) for the uncapped-AgNP formulations.

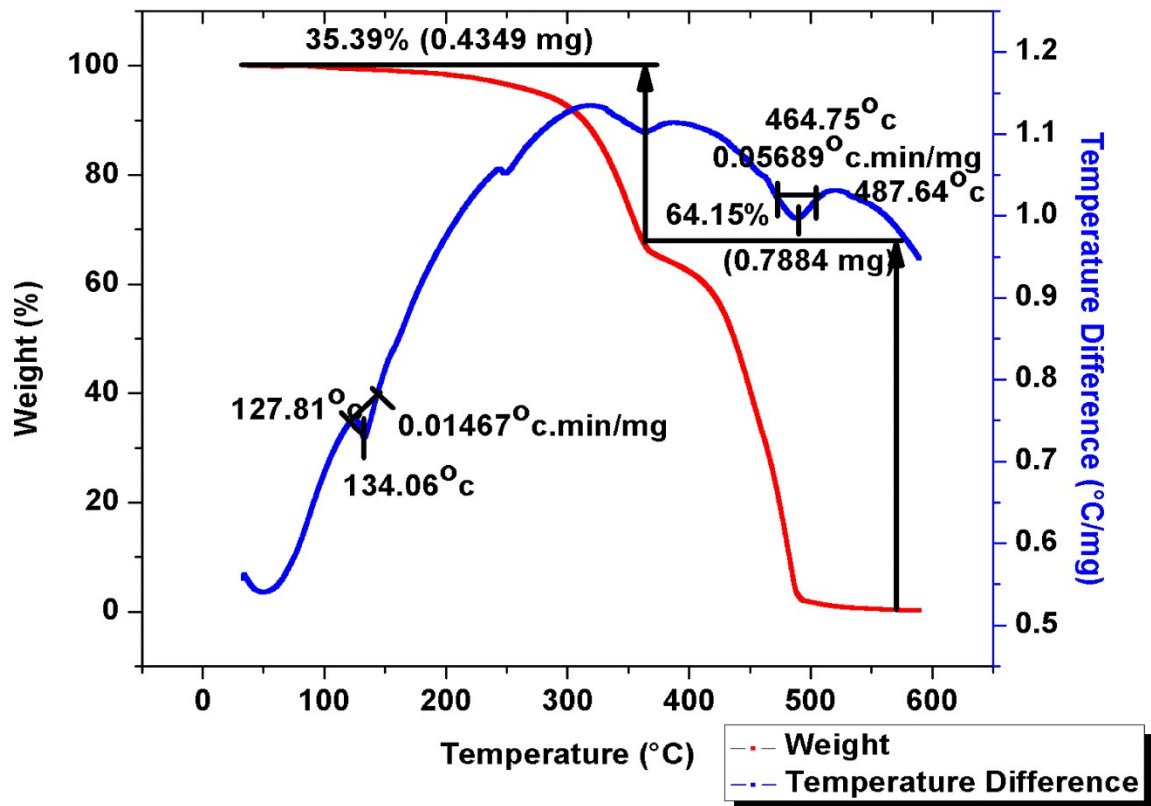

Fig. 2 Evaluation of Thermo gravimetric analysis/ Differential Thermal analysis (TGA/DTA) for the PVA-AgNP Formulations.

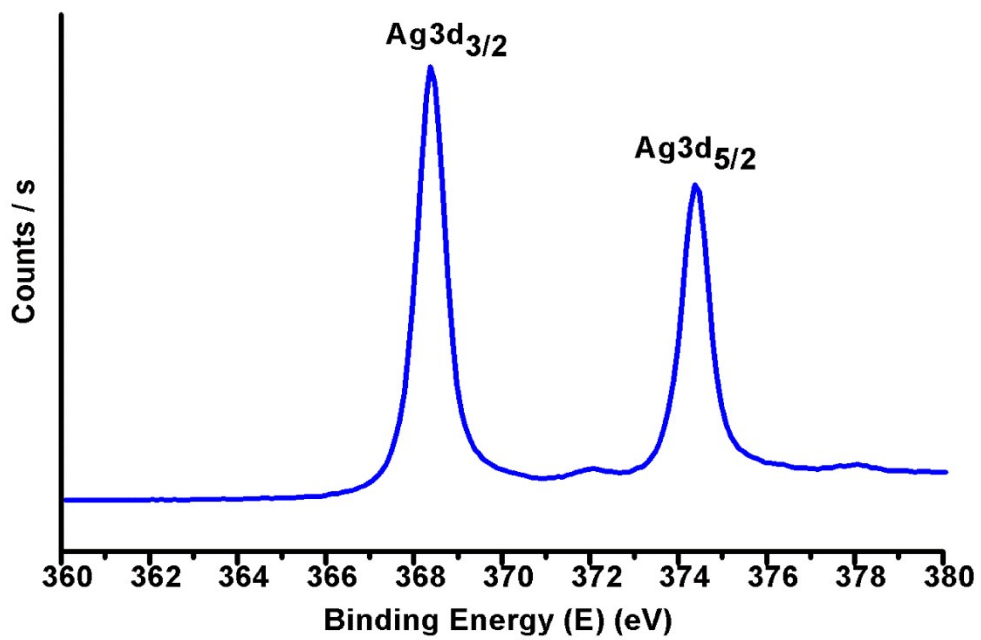

**Fig. 3 Evaluation of elemental analysis using X-Ray photoelectron Spectroscopy (XPS) for uncapped-AgNP Formulations.**

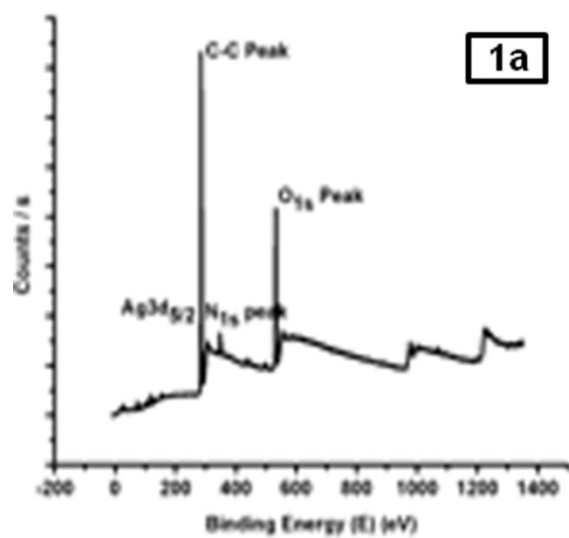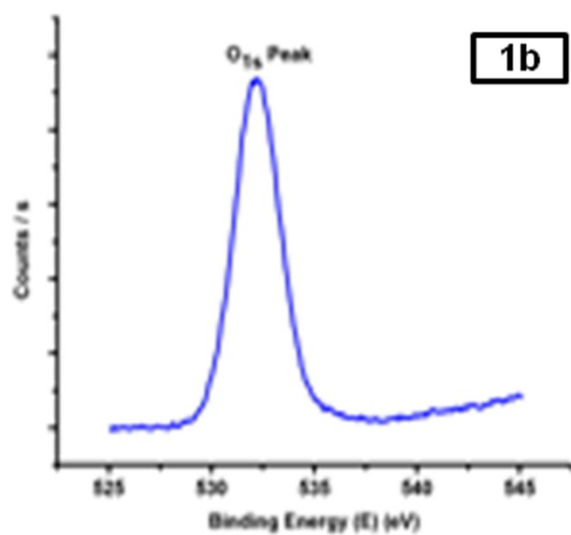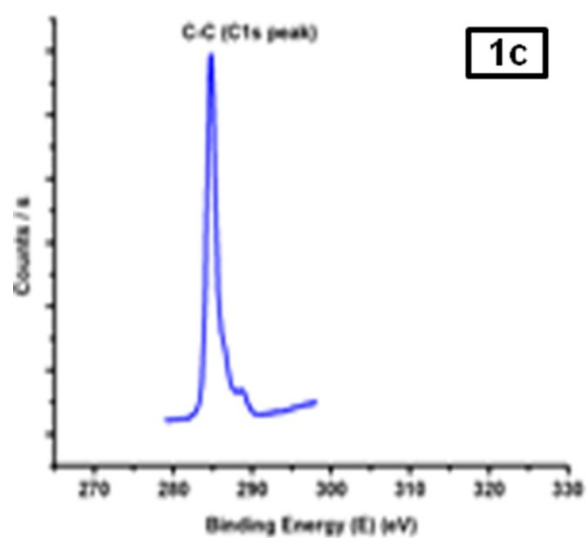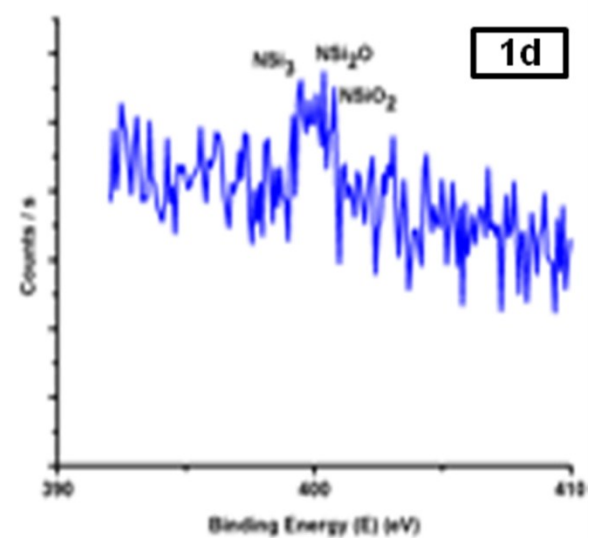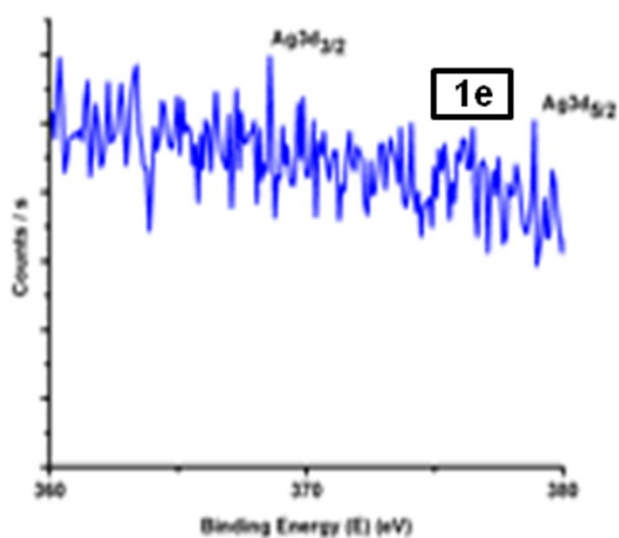

**Fig. 4 Evaluation of elemental analysis using X-Ray photoelectron Spectroscopy (XPS) for PVA-AgNP formulations.** (1a) Complete XPS surface analysis for PVA-AgNPs (1b) Core Oxygen peak for PVA-AgNPs (1c) Core carbon Peak for PVA-AgNPs (1d) Core Nitrogen peak for PVA-AgNPs (1e) Core AgNP peak for AgNPs.
